# Supplementary material
Source: PubMed Central journal article supplement (PMC4947025)

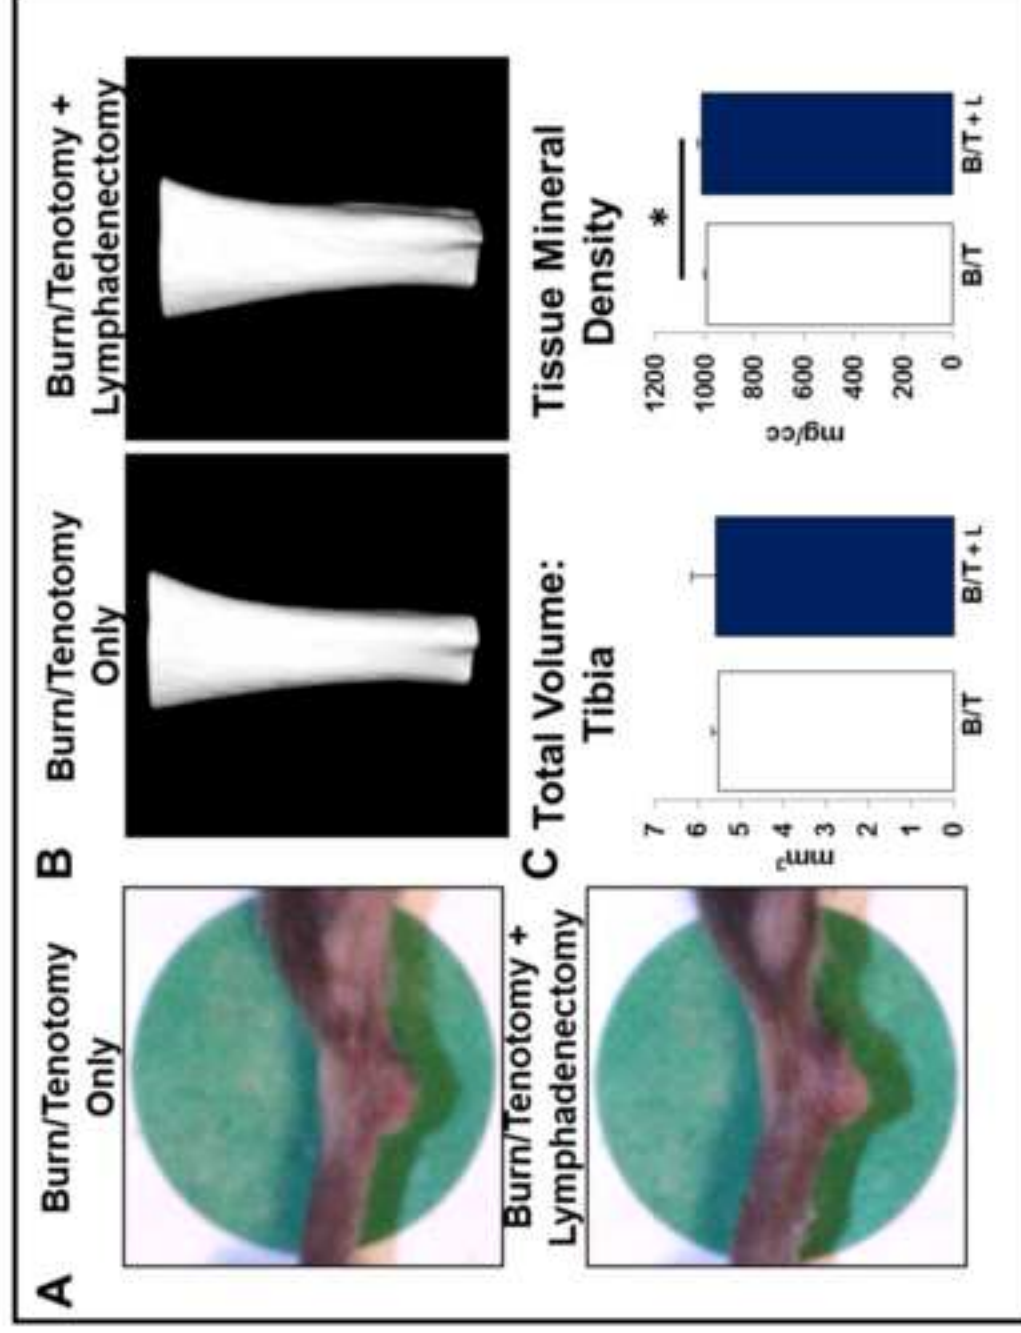

Supplement: NIHMS756424-supplement-Fig1.pdf [file NIHMS756424-supplement-Fig1.pdf]
